# Supplementary material for: In Silico Analysis and Functional Characterization of Antimicrobial and Insecticidal Vicilin from Moth Bean (Vigna aconitifolia (Jacq.) Marechal) Seeds
Source: Molecules. 2022 May 19;27(10):3251. doi: 10.3390/molecules27103251 (PMC9145308; doi:10.3390/molecules27103251)
Supplement: Supplementary file 1 [file molecules-27-03251-s001.zip › Supplementary_Tables-4.24.xlsx]

## Sheet: Supplementary Table S1
Different percentage of Ramachandran plot.
Z-score	-6.5
Poor rotamers	0.0141
Ramachandran favored	0.9439
Ramachandran outliners	0.0077
Ramachandran rotamers	0.9437
Bad bonds	0
Bad angles	0

## Sheet: Supplementary Table S2
Position and types of gamma turns.
No.	Start	End	Turn type
1	Arg245	Glu247	INVERSE
2	Glu247	Ser249	INVERSE
3	Ser421	Phe423	CLASSIC

## Sheet: Supplementary Table S3
Beta hairpins in VacV strands with amino acid position and length.
Strand 1				Strand 2
No.	Start	End	Length	Start	End	Length
1	Phe53	Asn59	7	Gly62	IIe67	6
2	Gly62	IIe67	6	Arg84	Ser90	7
3	Ala114	Leu118	5	Ser125	Leu128	4
4	Try264	Ser265	2	Gly269	IIe274	6
5	Gly269	IIe274	6	Val287	Met294	8
6	Ala319	Asp328	10	Leu336	Leu345	10

## Sheet: Supplementary Table S4
Number of beta bulges with different types in VacV.
No.	Bulge type	Res X	Res 1	Res 2
1	Antiparallel classic	Leu64A	Leu56A	Phe57A
2	Antiparallel G1	Val109A	Gly131A	His132A
3	Antiparallel wide	Phe143A	Leu97A	Pro98A
4	Antiparallel G1	Asn146A	Asn93A	Thr94A
5	Antiparallel classic	Arg154A	Leu110A	Asn111A
6	Antiparallel classic	Trp271A	IIe263A	Try264A
7	Antiparallel G1	IIe314A	Asp348A	Asp349A
8	Antiparallel wide	Ala360A	Leu301A	Pro302A
9	Antiparallel G1	Ala363A	Gly297A	Gly298A
10	Antiparallel classic	Asn368A	Asn315A	Glu316A

## Sheet: Supplementary Table S5
Number of strands and types of beta sheets.
No.	Sheet	No. of strands	Type
1	A	7	Mixed
2	B	7	Antiparallel
3	C	7	Antiparallel
4	D	6	Antiparallel

## Sheet: Supplementary Table S6
Number of helices and sequence of amino acids.
No.	Start	End	No. of residue	Sequence
1	Lys75	Leu80	6	KQIQNL
2	Lys188	Phe195	8	KNILEASF
3	Phe199	Leu206	8	FKEIDRVL
4	Gln213	Glu218	6	QQHGEE
5	Arg230	IIe237	8	REQIRELI
6	Pro280	Leu285	6	PQLKDL
7	Thr397	Ser403	7	TEVLDVS
8	Gly408	IIe415	8	GNKVEKLI

## Sheet: Supplementary Table S7
Number of helices and sequence of amino acids.
No.	Start	End	No. of residue	Sequence
1	Asp37	Ser38	2	DS
2	Try46	Phe47	2	YF
3	Phe53	Asn59	7	FHITLFKN
4	Gly63	IIe67	6	GHLRVI
5	Arg84	Ser90	7	RVVEFKS
6	Thr94	Ala101	8	TLLLPHHA
7	Ala103	Asn146	9	ADFLLVVLN
8	Ala114	Leu118	5	AILTL
9	Ser125	Leu128	4	SYIL
10	His132	IIe136	5	HAQKI
11	Phe142	Asn146	5	FFLVN
12	Leu153	Pro161	9	LRIIKLAIP
13	Asn170	Phe172	3	NFF
14	IIe225	Glu227	3	IVE
15	Phe255	Asn256	2	FN
16	Try264	Ser265	2	YS
17	Gly269	IIe274	6	GRWYEI
18	Val278	Met294	8	VFISSVDM
19	Gly298	Asn305	8	GLLLPHYN
20	IIe309	Glu316	8	IVILVINE
21	Ala319	Asp328	10	AKIELVGPSD
22	Leu336	Leu345	10	LEVQRYRAEL
23	Val350	IIe353	4	VFVI
24	Val359	Ala363	5	VAINA
25	Leu367	IIe374	8	LNFFAFGI
26	Arg381	Phe383	3	RNF
27	Phe423	Asp425	3	FVD

## Sheet: Supplementary Table S8
Confirmation of H-bond and turn type in beta turns.
No.	Turn	Sequence	Turn type	H-bond
1	Asn43-Tyr46	NPFY	I	Yes
2	Asn48-Arg51	NSDR	I	No
3	Ser49-Arg52	SDRR	IV	Yes
4	Asp50-Phe53	DRRF	IV	Yes
5	Asn59-Gly62	NQYG	I	No
6	Arg69-Gln72	RFDQ	I	Yes
7	Phe70-Arg73	FDQR	I	No
8	Asp71-Ser74	DQRS	I	Yes
9	Leu80-Try83	LENY	I	No
10	Lys91-Thr94	KPNT	II	No
11	Asn119-Gly122	NPDG	IV	Yes
12	Pro120-Arg123	PDGR	IV	Yes
13	Glu129-His132	EQGH	II	No
14	Pro137-Thr140	PAGT	II	No
15	Asn148-Asp151	NDND	IV	Yes
16	Pro161-Thr164	PVNN	IV	Yes
17	Val162-Pro165	VNNP	VIII	Yes
18	Asn164-Arg167	NPHR	I	No
19	Thr176-Gln179	TEAQ	I	No
20	Glu209-Gln212	EERQ	IV	Yes
21	Gly223-Val226	GVIV	VIII	Yes
22	IIe237-Ala240	IKHA	I	No
23	Ser244-Glu247	SRKE	IV	Yes
24	Glu247-Ser250	ELSS	IV	No
25	Ser250-Glu253	SQDE	IV	Yes
26	Asn256-Asn259	NLRN	I	No
27	Leu257-Ser260	LRNS	IV	Yes
28	Pro262-Ser265	PIYS	VIII	Yes
29	Asn266-Gly269	NKFG	I	Yes
30	Thr275-Lys278	TPFK	I	No
31	Pro276-Asn279	PEKN	I	Yes
32	Lys295-Gly298	KEGG	II	No
33	Asn305-Ala308	NSKA	I	Yes
34	Gln330-Asp333	QQQD	IV	Yes
35	Ser346-Asp349	SEDD	II	No
36	Pro354-Tyr357	PAAY	II	No
37	Ala363-Asn366	ATSN	IV	Yes
38	Gly373-Ala376	GINA	IV	Yes
39	Ala376-Asn379	AENN	II	No
40	Glu387-Asn390	EKDN	II	No
41	Asn390-Ser393	NVMS	I	No
42	Val391-Glu394	VMSE	I	Yes
43	Met392-IIe395	MSEI	I	No
44	Ser421-Val424	SHFV	IV	Yes

## Sheet: Supplementary Table S9
	Amino Acid Conservation Scores
Colour :	The color scale representing the conservation scores (9 - conserved, 1 - variable).
FUNCTION: functional (f) or structural (s) residue (f - highly conserved and exposed, s - highly conserved and burried).
MSA DATA: The number of aligned sequences having an amino acid (non-gapped) from the overall number of sequences at each position.
POS	SEQ	SCORE	COLOR	CONFIDENCE INTERVAL	FUNCTION	RESIDUE VARIETY
		(normalized)
1	M	-0.824	7	-1.384,-0.495	9,6	e		13/108	M
2	V	2.484	1	1.287, 2.930	1,1	e		15/108	V,M,L,T,H
3	R	-0.655	7	-1.187,-0.343	8,6	e		15/108	R,S
4	A	-0.613	7	-1.126,-0.260	8,6	e		15/108	E,A
5	R	-1.051	8	-1.463,-0.826	9,7	e	f	16/108	R
6	V	0.373	4*	-0.343, 0.980	6,2	b		17/108	V,L,F,I
7	Q	0.269	4	-0.495, 0.746	6,3	e		19/108	P,S,Q
8	L	-0.135	5	-0.700, 0.259	7,4	b		22/108	L,F,M,V
9	L	-1.125	8	-1.571,-0.947	9,8	b		22/108	L
10	L	-0.909	8	-1.314,-0.700	9,7	b		23/108	L,F
11	G	-1.005	8	-1.463,-0.763	9,7	b		25/108	G
12	I	0.441	4	-0.172, 0.746	6,3	b		26/108	V,L,S,F,I,T
13	L	-0.262	6	-0.763, 0.135	7,5	b		25/108	A,V,F,L
14	F	-0.079	5	-0.633, 0.259	7,4	b		26/108	L,F,K,R
15	L	-0.992	8	-1.384,-0.763	9,7	b		26/108	L,R
16	A	-0.983	8	-1.384,-0.763	9,7	b		24/108	A,L
17	S	-1.106	8	-1.384,-0.947	9,8	b		26/108	C,S,T
18	L	-0.172	6	-0.700, 0.135	7,5	b		25/108	T,I,L,V
19	S	-1.066	8	-1.384,-0.887	9,8	b		24/108	S,C
20	V	0.114	5	-0.420, 0.558	6,3	b		24/108	A,I,L,V
21	S	-0.687	7	-1.066,-0.420	8,6	b		22/108	T,A,G,S
22	F	0.229	4	-0.420, 0.746	6,3	b		22/108	Y,L,F
23	G	0.296	4	-0.420, 0.746	6,3	b		20/108	S,A,P,G
24	I	1.165	2	0.259, 1.749	4,1	b		21/108	R,G,H,T,A,I
25	V	1.057	2*	0.135, 1.749	5,1	b		23/108	K,P,V,E,L,S
26	H	1.359	1	0.397, 1.749	4,1	e		27/108	Y,H,G,V,E,Q,S
27	R	2.296	1	1.287, 2.930	1,1	e		32/108	W,H,P,R,E,Q
28	E	2.63	1	1.749, 2.930	1,1	e		58/108	S,E,N,Q,G,R,P,Y
29	H	2.703	1	1.749, 2.930	1,1	e		64/108	Q,N,W,P,G,R,E,S,D,T,H,K
30	Q	2.853	1	1.749, 2.930	1,1	e		69/108	G,R,Q,V,K,H,T,D,S,I,E
31	E	1.25	1	0.558, 1.749	3,1	e		72/108	Q,R,G,E,S,T,A,D,K,H
32	S	1.384	1	0.746, 1.749	3,1	e		75/108	Q,R,G,Y,I,S,E,K,T,D
33	Q	2.744	1	1.749, 2.930	1,1	e		77/108	Q,V,N,R,G,P,E,S,D,A,K
34	E	2.892	1	1.749, 2.930	1,1	e		86/108	W,R,G,P,Q,V,L,T,D,K,E,S
35	E	0.994	2	0.397, 1.287	4,1	e		87/108	I,S,E,M,K,T,D,N,Q,V,G,R,P
36	S	1.105	2	0.558, 1.287	3,1	e		89/108	R,G,P,Q,L,N,T,D,K,H,E,M,S
37	D	2.837	1	1.749, 2.930	1,1	e		89/108	V,Q,P,R,G,Y,S,I,E,M,H,K,D,A,T
38	S	1.136	2	0.558, 1.287	3,1	e		93/108	Q,N,L,P,R,G,E,I,S,D,A,T,H,K
39	R	2.503	1	1.287, 2.930	1,1	e		96/108	Q,P,G,R,S,E,H,K,D,T
40	G	1.597	1	0.980, 1.749	2,1	e		100/108	Q,R,G,W,S,E,M,K,H,T,A,D
41	Q	2.629	1	1.749, 2.930	1,1	e		101/108	M,E,S,T,H,K,V,Q,N,L,P,G,R
42	N	0.662	3	0.259, 0.980	4,2	e		101/108	E,S,T,D,K,H,Q,N,Y,R
43	N	-1.43	9	-1.681,-1.384	9,9	e	f	101/108	D,Y,S,N
44	P	-1.4	9	-1.681,-1.314	9,9	e	f	101/108	P
45	F	-0.857	8	-1.126,-0.700	8,7	e	f	101/108	Y,F
46	Y	1.289	1	0.746, 1.749	3,1	e		101/108	Y,H,V,I,F,L
47	F	-0.714	7	-1.007,-0.495	8,6	b		101/108	Y,V,I,F,L
48	N	1.43	1	0.746, 1.749	3,1	e		101/108	G,R,P,Q,N,D,A,K,H,E,M,S
49	S	-0.799	7	-1.007,-0.633	8,7	e		102/108	N,G,Y,S,E,K,D,A
50	D	0.149	5	-0.172, 0.397	6,4	e		102/108	R,N,Q,K,H,A,D,I,S,E
51	R	1.034	2	0.558, 1.287	3,1	e		102/108	G,K,R,H,N,S,M
52	R	0.856	2*	-0.172, 1.749	6,1	e		11/108	S,W,R
53	F	-0.497	6	-0.826,-0.260	7,6	b		102/108	A,W,F,I,L
54	H	1.172	2	0.558, 1.749	3,1	e		101/108	R,N,L,Q,H,D,I,S,F,E,X
55	T	-0.781	7	-1.007,-0.633	8,7	b		101/108	L,N,Q,P,Y,S,X,K,T,D
56	L	0.477	4	0.024, 0.746	5,3	e		102/108	V,L,Y,P,G,R,I,F,A,H,K
57	F	0.452	4	0.024, 0.746	5,3	b		102/108	H,Y,L,F,V
58	K	1.109	2	0.558, 1.287	3,1	e		103/108	A,K,H,E,S,R,G,Q,N
59	N	-1.249	9	-1.463,-1.187	9,8	e	f	104/108	N,S,T,A
60	Q	0.935	2	0.397, 1.287	4,1	e		104/108	N,Q,G,R,P,S,E,K,D
61	Y	0.183	4	-0.172, 0.397	6,4	e		104/108	E,F,S,D,K,H,N,L,W,Y,R
62	G	-1.229	9	-1.571,-1.066	9,8	e	f	105/108	K,G
63	H	2.024	1	0.980, 2.930	2,1	e		105/108	R,G,Y,N,V,Q,H,K,F,S,E
64	L	0.478	4	0.024, 0.746	5,3	b		105/108	M,V,L,I,F,T,W
65	R	-0.349	6	-0.633,-0.172	7,6	e		105/108	Y,K,R,H,P,Q,S
66	V	-0.411	6	-0.700,-0.260	7,6	b		105/108	S,I,H,A,L,V,R,Y
67	I	-1.122	8	-1.384,-1.007	9,8	b		105/108	F,I,L,T
68	H	-0.669	7	-0.947,-0.495	8,6	e		105/108	Q,V,E,H,P
69	R	-0.448	6	-0.763,-0.260	7,6	e		105/108	M,N,S,G,K,R
70	F	-1.279	9	-1.571,-1.187	9,8	b	s	105/108	L,F
71	D	-0.514	7	-0.763,-0.343	7,6	e		105/108	N,G,Y,S,E,T,A,D
72	Q	0.444	4	0.024, 0.746	5,3	e		102/108	S,E,K,H,T,D,Q,R,G
73	R	-0.08	5	-0.420, 0.135	6,5	e		104/108	H,K,D,S,E,R,L,V,Q
74	S	-1.21	9	-1.384,-1.126	9,8	e	f	105/108	C,F,S,N,T
75	K	1.022	2	0.558, 1.287	3,1	e		105/108	P,R,G,N,Q,H,K,D,T,S,E
76	Q	-0.241	6	-0.565, 0.024	7,5	e		105/108	I,H,K,D,L,V,Q,R
77	I	-0.658	7	-0.947,-0.495	8,6	b		105/108	M,I,F,L
78	Q	-0.115	5	-0.420, 0.135	6,5	e		106/108	Q,E,L,S,K,R,H
79	N	-0.882	8	-1.126,-0.700	8,7	e	f	106/108	F,M,K,A,D,N,R,G,W
80	L	-0.978	8	-1.187,-0.826	8,7	b		106/108	L,I,V,M
81	E	-0.194	6	-0.495, 0.024	6,5	e		106/108	K,R,D,E,Q
82	N	-1.119	8	-1.314,-1.007	9,8	e	f	106/108	N,E,K,G,D,Y
83	Y	-0.892	8	-1.187,-0.700	8,7	b		106/108	H,Y,F,N
84	R	-1.198	9	-1.384,-1.066	9,8	e	f	106/108	R,G,C,Q
85	V	0.184	4	-0.172, 0.397	6,4	b		106/108	Y,V,L,I,F
86	V	0.505	4	0.024, 0.746	5,3	b		106/108	V,L,G,E,F,I,S,T,A
87	E	-0.619	7	-0.887,-0.420	8,6	e		106/108	E,V,Q,I,F,L,T
88	F	0.6	3	0.135, 0.980	5,2	b		106/108	M,C,F,I,T,V,L,Y
89	K	0.251	4	-0.078, 0.558	5,3	e		106/108	H,K,D,T,M,C,E,R,N,Q
90	S	-0.723	7	-0.947,-0.565	8,7	e		106/108	V,M,S,F,L,A
91	K	-0.581	7	-0.826,-0.420	7,6	e		106/108	N,V,Q,R,E,M,K,A
92	P	-1.131	8	-1.384,-0.947	9,8	e	f	106/108	P,L,S
93	N	-0.459	6	-0.700,-0.260	7,6	e		106/108	R,G,Q,N,T,K,H,E,S
94	T	-1.225	9	-1.463,-1.126	9,8	e	f	105/108	T,A,V,S
95	L	-0.319	6	-0.633,-0.078	7,5	b		105/108	A,I,F,L,V,M
96	L	0.003	5	-0.343, 0.259	6,4	b		105/108	I,F,L,M,V,A
97	L	-0.664	7	-0.947,-0.495	8,6	b		105/108	A,V,I,L
98	P	-1.263	9	-1.571,-1.126	9,8	e	f	106/108	R,P
99	H	0.141	5	-0.260, 0.397	6,4	e		106/108	N,M,Q,H,K,Y,T
100	H	-0.661	7	-0.947,-0.420	8,6	e		106/108	Q,N,F,Y,H
101	A	1.138	2	0.558, 1.287	3,1	b		106/108	W,R,Q,V,N,L,T,A,K,C,S,F,I
102	D	-1.174	8	-1.384,-1.066	9,8	e	f	106/108	D,K,E,N
103	A	-1.38	9	-1.571,-1.314	9,9	b	s	106/108	A,S,E
104	D	-0.621	7	-0.887,-0.420	8,6	e		106/108	E,D,K
105	F	1.015	2	0.558, 1.287	3,1	b		106/108	N,L,Y,C,S,F,T,A
106	L	-0.469	6	-0.763,-0.260	7,6	b		105/108	L,I,F,V,M
107	L	0.657	3	0.135, 0.980	5,2	b		105/108	I,F,L,V,Y
108	V	0.003	5	-0.343, 0.259	6,4	b		106/108	A,T,V,I,S,F,L
109	V	-0.868	8	-1.066,-0.700	8,7	b		106/108	V,M,L,N,I,K
110	L	0.144	5	-0.260, 0.397	6,4	b		106/108	R,V,Q,L,A,T,K,M,F,I
111	N	0.49	4	0.135, 0.746	5,3	e		106/108	M,E,S,D,K,Q,N,G,R
112	G	-1.381	9	-1.681,-1.314	9,9	b	s	106/108	G
113	R	0.541	3	0.135, 0.746	5,3	e		106/108	E,S,T,K,Q,N,G,R
114	A	-0.773	7	-1.066,-0.565	8,7	b		106/108	P,G,A,C
115	I	-0.31	6	-0.633,-0.078	7,5	b		106/108	A,T,V,I,L
116	L	-0.472	6	-0.763,-0.260	7,6	b		106/108	I,F,L,C,V,A
117	T	-0.08	5	-0.420, 0.135	6,5	b		106/108	G,N,V,K,T,A,I,S,M
118	L	0.546	3	0.135, 0.746	5,3	b		106/108	V,L,Y,C,M,F,I,T
119	V	-0.703	7	-0.947,-0.565	8,7	b		106/108	I,L,M,E,V,Q,A
120	N	0.34	4	-0.078, 0.558	5,3	e		106/108	W,R,G,Q,V,L,N,T,K,H,M,E,S
121	P	0.351	4	-0.078, 0.558	5,3	e		106/108	R,G,P,N,Q,K,H,T,D,S
122	D	-0.084	5	-0.420, 0.135	6,5	e		106/108	K,D,T,S,E,G,N,Q
123	G	0.8	3	0.397, 0.980	4,2	e		106/108	N,Q,G,R,Y,S,E,K,T,D
124	R	-0.74	7	-1.007,-0.565	8,7	e		107/108	T,K,R,V,I,S
125	D	-0.385	6	-0.700,-0.172	7,6	e		107/108	Q,V,N,R,E,I,D,K
126	S	-1.024	8	-1.249,-0.887	9,8	e	f	107/108	P,T,A,I,S,V,E
127	Y	0.51	4	0.024, 0.746	5,3	e		107/108	H,Y,L,N,F
128	I	-0.639	7	-0.887,-0.495	8,6	e		107/108	N,R,Y,F,S,I,H,K,D
129	L	-0.866	8	-1.126,-0.700	8,7	b		107/108	A,M,V,L,I
130	E	-0.52	7	-0.763,-0.343	7,6	e		107/108	Q,E,T,D,R,K,H
131	Q	2.297	1	1.287, 2.930	1,1	e		107/108	Y,P,G,R,Q,N,L,A,T,H,K,M,C,E,S
132	G	-0.367	6	-0.763,-0.078	7,5	e		107/108	A,T,G,Q,F,S
133	H	-1.154	8	-1.384,-1.007	9,8	e	f	107/108	Y,D,H
134	A	-0.638	7	-0.887,-0.495	8,6	b		107/108	N,L,V,A,T
135	Q	-0.323	6	-0.633,-0.078	7,5	b		107/108	V,M,Q,F,I,L,A
136	K	-0.376	6	-0.633,-0.172	7,6	e		107/108	R,N,V,K,T,A,S,I,M
137	I	-0.073	5	-0.420, 0.135	6,5	b		107/108	H,T,F,I,S,L,V
138	P	-0.098	5	-0.495, 0.135	6,5	e		107/108	Q,L,S,R,P
139	A	-1.133	8	-1.384,-1.007	9,8	e	f	107/108	A,P,V,S
140	G	-1.383	9	-1.681,-1.314	9,9	e	f	107/108	G
141	T	-0.1	5	-0.420, 0.135	6,5	b		107/108	S,F,N,V,R,A,T
142	T	-0.407	6	-0.700,-0.260	7,6	b		107/108	T,P,M,I,L
143	F	0.735	3	0.259, 0.980	4,2	b		107/108	S,I,F,C,E,H,A,T,L,V,G,Y
144	F	-1.098	8	-1.314,-0.947	9,8	b		107/108	H,Y,F
145	L	-0.098	5	-0.420, 0.135	6,5	b		107/108	A,T,M,F,I,P,V,L
146	V	1.263	1	0.746, 1.749	3,1	b		107/108	V,M,I,S,L,A,T
147	N	-1.44	9	-1.681,-1.384	9,9	e	f	107/108	N,S,T
148	P	1.949	1	0.980, 2.930	2,1	e		106/108	H,K,D,T,S,E,P,R,G,N,L,V,Q
149	N	-0.179	6	-0.495, 0.024	6,5	e		107/108	H,D,A,S,E,G,N,Q
150	D	0.368	4	0.024, 0.558	5,3	e		106/108	P,G,R,Q,N,D,K,E,S,I
151	N	0.022	5	-0.260, 0.259	6,4	e		107/108	G,V,N,A,D,T,H,K,E,S
152	D	-0.33	6	-0.633,-0.172	7,6	e		107/108	N,Q,V,E,K,G,D
153	N	0.519	3	0.135, 0.746	5,3	e		107/108	P,R,N,Q,K,D,T,S,E,M
154	L	-1.146	8	-1.384,-1.007	9,8	b		107/108	P,L,F,V
155	R	0.131	5	-0.260, 0.397	6,4	e		106/108	R,Y,N,L,Q,K,H,E
156	I	-0.365	6	-0.633,-0.172	7,6	b		106/108	A,L,F,I,V,M
157	I	0.334	4	-0.078, 0.558	5,3	b		106/108	A,T,I,L,M,V
158	K	-0.639	7	-0.887,-0.495	8,6	e		106/108	R,Q,V,N,T,D,A,K,C,E,S
159	L	-0.768	7	-1.066,-0.565	8,7	b		106/108	F,I,L
160	A	0.535	3	0.135, 0.746	5,3	b		106/108	K,A,F,I,S,M,L,V
161	I	-0.174	6	-0.495, 0.024	6,5	b		106/108	Q,V,L,R,E,M,F,I,T
162	P	-0.019	5	-0.420, 0.259	6,4	e		106/108	T,P,S
163	V	-0.621	7	-0.887,-0.420	8,6	b		105/108	A,F,I,L,V
164	N	-1.368	9	-1.571,-1.314	9,9	e	f	105/108	N,S,R,D
165	N	0.222	4	-0.172, 0.397	6,4	e		105/108	V,Q,N,R,G,E,M,I,S,T,K
166	P	-1.12	8	-1.384,-0.947	9,8	e	f	105/108	L,P,H
167	H	-0.057	5	-0.495, 0.259	6,4	e		103/108	A,D,T,H,G,S
168	R	0.695	3	0.259, 0.980	4,2	e		106/108	R,Y,N,Q,K,T,S,I,E
169	F	1.062	2	0.558, 1.287	3,1	b		106/108	V,I,S,F,L,Y,P
170	Q	0.32	4	-0.078, 0.558	5,3	e		107/108	E,M,S,D,T,H,K,V,Q,Y,R
171	N	0.406	4	0.024, 0.746	5,3	e		107/108	P,G,Q,N,D,A,T,E,S
172	F	-0.748	7	-1.007,-0.565	8,7	b		107/108	Y,L,F
173	F	1.125	2	0.558, 1.287	3,1	e		107/108	D,T,F,S,Y,G,V,N,L
174	L	0.166	5	-0.260, 0.397	6,4	e		107/108	A,G,P,V,L,S
175	S	-0.536	7	-0.763,-0.343	7,6	e		106/108	Y,A,G,V,I,F,S
176	S	0.427	4	0.024, 0.746	5,3	e		106/108	E,S,N,A,T,R,G
177	T	0.023	5	-0.343, 0.259	6,4	e		106/108	A,T,G,S,N
178	E	0.331	4	-0.078, 0.558	5,3	e		106/108	G,R,K,D,N,Q,E
179	A	0.409	4	0.024, 0.746	5,3	e		107/108	D,A,T,H,K,E,I,F,S,Y,P,R,V,Q,N
180	Q	-0.38	6	-0.700,-0.172	7,6	e		106/108	T,D,H,S,R,G,P,Q,L,N
181	Q	-0.085	5	-0.420, 0.135	6,5	e		91/108	Q,N,R,P,E,S,D,K
182	S	-1.416	9	-1.571,-1.314	9,9	b	s	91/108	A,P,N,S
183	Y	-0.435	6	-0.763,-0.172	7,6	e		107/108	Y,S,F,I
184	L	-0.121	5	-0.495, 0.135	6,5	b		107/108	L,F,Y
185	R	0.536	3	0.135, 0.746	5,3	e		108/108	T,K,H,M,S,Y,G,R,Q,N
186	G	0.209	4	-0.172, 0.558	6,3	e		108/108	E,S,T,A,V,R,G,P
187	F	-1.391	9	-1.681,-1.314	9,9	b	s	108/108	F,L
188	S	-1.383	9	-1.571,-1.314	9,9	b	s	108/108	G,R,S,I,N
189	K	-0.251	6	-0.565,-0.078	7,5	e		108/108	S,E,K,H,T,D,N,Q,R,Y
190	N	-0.408	6	-0.700,-0.260	7,6	e		108/108	Q,E,N,S,D,K,H
191	I	-0.328	6	-0.633,-0.172	7,6	b		107/108	F,I,V,H,T
192	L	-1.497	9	-1.681,-1.463	9,9	b	s	107/108	L
193	E	-1.112	8	-1.314,-1.007	9,8	e	f	107/108	D,K,R,V,E,Q,S
194	A	-0.888	8	-1.126,-0.763	8,7	b		107/108	S,P,R,A,T
195	S	-0.646	7	-0.887,-0.495	8,6	b		107/108	T,A,S,F
196	F	-0.218	6	-0.565, 0.024	7,5	b		107/108	Y,L,S,F,M
197	D	-0.935	8	-1.126,-0.826	8,7	e	f	107/108	H,G,K,D,S,N,E
198	S	0.245	4	-0.078, 0.558	5,3	e		106/108	I,S,L,V,A,T
199	D	2.358	1	1.287, 2.930	1,1	e		106/108	S,E,H,K,D,T,N,Q,P,G,R
200	F	0.497	4	0.024, 0.746	5,3	e		106/108	K,T,I,S,F,E,M,R,Y
201	K	-0.041	5	-0.343, 0.135	6,5	e		106/108	N,E,K,D
202	E	-0.168	5	-0.495, 0.024	6,5	e		106/108	T,D,K,M,E,I,R,Q,N,L
203	I	-1.214	9	-1.384,-1.126	9,8	b	s	107/108	L,S,I,V
204	D	-0.045	5	-0.343, 0.135	6,5	e		107/108	Q,N,R,G,E,S,D,T,H,K
205	R	0.374	4	0.024, 0.558	5,3	e		107/108	S,E,K,H,N,Q,G,R
206	V	-0.011	5	-0.343, 0.259	6,4	b		107/108	G,V,L,A,T,M,F,I
207	L	-0.432	6	-0.763,-0.172	7,6	b		107/108	F,I,L,T,W
208	F	0.67	3	0.135, 0.980	5,2	e		107/108	N,L,Q,G,R,W,I,S,F,E,K,T,A,D
209	G	0.045	5	-0.343, 0.259	6,4	e		106/108	A,K,E,S,R,G,Q,V
210	E	0.445	4	0.024, 0.746	5,3	e		93/108	T,D,H,E,S,Y,G,R,Q,N
211	E	1.056	2	0.558, 1.287	3,1	e		89/108	N,Q,R,P,S,E,K,H,T,D
212	R	2.149	1	1.287, 2.930	1,1	e		81/108	E,Q,G,K,R,A,D
213	Q	2.225	1	1.287, 2.930	1,1	e		58/108	T,H,K,E,I,G,R,Q,N,L
214	Q	0.377	4	-0.172, 0.746	6,3	e		56/108	E,Q,H,K,G
215	Q	0.948	2	0.259, 1.287	4,1	e		55/108	P,K,G,T,S,E,Q
216	H	0.343	4	-0.172, 0.746	6,3	e		54/108	N,Q,R,Y,E,H,K,D
217	G	2.522	1	1.287, 2.930	1,1	e		71/108	R,G,L,Q,K,H,T,D,I,S,E
218	E	0.801	3	0.259, 1.287	4,1	e		75/108	Q,L,R,G,P,E,S,K
219	E	-0.044	5	-0.420, 0.259	6,4	e		83/108	G,R,H,S,Q,E
220	S	1.528	1	0.746, 1.749	3,1	e		83/108	H,T,D,S,I,E,G,R,Y,L,N,Q,V
221	Q	0.3	4	-0.078, 0.558	5,3	e		108/108	G,R,Q,L,N,T,D,K,H,M,E,S
222	E	-0.049	5	-0.420, 0.135	6,5	e		108/108	E,S,D,K,Q,N,R,G
223	E	-0.056	5	-0.343, 0.135	6,5	e		108/108	E,T,D,A,K,Q,V,R,G,P
224	G	0.396	4	-0.078, 0.746	5,3	e		108/108	G,N,A,D,H,K,E,S
225	V	-0.429	6	-0.700,-0.260	7,6	b		108/108	V,L,Y,P,M,I,S,F,A,T,H,K
226	I	-1.013	8	-1.249,-0.887	9,8	b		108/108	M,V,F,I,L
227	V	-0.575	7	-0.826,-0.420	7,6	b		108/108	R,K,M,V,I,L
228	E	-0.03	5	-0.343, 0.135	6,5	e		108/108	E,I,S,T,K,Q,N,R
229	L	-0.159	5	-0.495, 0.024	6,5	b		108/108	M,V,I,L,A,G
230	K	-1.097	8	-1.314,-1.007	9,8	e	f	108/108	S,E,P,G,K,D,T
231	R	-0.215	6	-0.495, 0.024	6,5	e		108/108	K,H,S,E,R,P,N,Q
232	E	-0.667	7	-0.887,-0.495	8,6	e		108/108	D,K,G,Q,E
233	Q	-0.994	8	-1.187,-0.887	8,8	e	f	108/108	K,H,L,Q
234	I	-0.74	7	-1.007,-0.565	8,7	b		108/108	R,A,L,S,I,V
235	R	0.115	5	-0.260, 0.397	6,4	e		108/108	M,E,Q,A,R,K
236	E	-0.782	7	-1.007,-0.633	8,7	e		108/108	Q,E,S,A,K
237	L	-1.154	8	-1.384,-1.007	9,8	b		108/108	P,I,L,M
238	I	-0.342	6	-0.633,-0.172	7,6	e		108/108	K,T,A,S,I,M,R,L,N
239	K	0.174	4	-0.172, 0.397	6,4	e		108/108	K,R,H,N,S,Q,E
240	H	1.245	1	0.558, 1.749	3,1	e		108/108	Y,G,R,Q,L,N,A,D,H,K,E,S
241	A	-0.704	7	-0.947,-0.495	8,6	b		108/108	M,I,S,D,A,T,V,P,R
242	K	-0.817	7	-1.007,-0.700	8,7	e		108/108	S,E,M,K,T,Q,G,R
243	S	-1.314	9	-1.463,-1.249	9,9	e	f	106/108	P,T,W,S,E
244	S	-0.245	6	-0.565,-0.078	7,5	e		106/108	S,I,T,A,K,V,N,L,R,G,P
245	S	-1.076	8	-1.249,-0.947	9,8	e	f	105/108	G,K,R,S,Q
246	R	0.66	3	0.259, 0.980	4,2	e		108/108	S,E,M,K,N,Q,R,G
247	K	-0.267	6	-0.565,-0.078	7,5	e		108/108	S,E,K,G,R,H
248	E	1.241	1	0.746, 1.749	3,1	e		108/108	Q,G,R,E,S,I,T,A,D,K,H
249	L	1.705	1	0.980, 1.749	2,1	e		97/108	G,R,V,L,N,A,D,T,H,K,E,S,F,I
250	S	-0.251	6	-0.565,-0.078	7,5	e		106/108	L,Q,G,R,P,S,E,H,D
251	S	-0.461	6	-0.700,-0.260	7,6	e		106/108	P,G,R,Q,A,D,T,K,E,S,F
252	Q	-0.088	5	-0.420, 0.135	6,5	e		106/108	T,D,K,E,S,G,P,Q,L
253	D	1.658	1	0.980, 1.749	2,1	e		107/108	D,E,C,M,S,W,Y,G,L,T,K,F,R,P,Q,N
254	E	0.375	4	-0.078, 0.746	5,3	e		106/108	E,T,A,K,Q,N,R,G,P
255	P	-0.956	8	-1.249,-0.763	9,7	e	f	106/108	L,Q,V,P
256	F	0.836	3	0.259, 1.287	4,1	b		106/108	V,M,L,F,I,Y
257	N	-1.211	9	-1.384,-1.126	9,8	e	f	106/108	Y,D,K,S,N
258	L	-1.339	9	-1.571,-1.249	9,9	b	s	107/108	L,I,V
259	R	0.373	4	-0.078, 0.746	5,3	e		107/108	R,G,Y,L,Q,K,H,D,F,I,E
260	N	0.09	5	-0.260, 0.259	6,4	e		107/108	S,E,H,K,D,T,N,Q,R,G,Y
261	S	2.255	1	1.287, 2.930	1,1	e		107/108	R,G,Q,N,L,D,K,H,E,I,S
262	N	1.422	1	0.746, 1.749	3,1	e		107/108	E,S,D,T,H,K,V,Q,N,R,G
263	P	-0.815	7	-1.126,-0.633	8,7	e		107/108	L,N,S,P
264	I	0.67	3	0.259, 0.980	4,2	e		108/108	R,L,V,Q,K,D,T,S,I,E
265	Y	-0.338	6	-0.700,-0.078	7,5	e		108/108	L,Q,Y,F,I,S,C,M,H
266	S	-1.332	9	-1.571,-1.249	9,9	e	f	108/108	C,N,S,A,G
267	N	-1.53	9	-1.681,-1.463	9,9	e	f	108/108	N,S
268	K	0.21	4	-0.172, 0.397	6,4	e		108/108	Q,N,R,E,S,D,T,K
269	F	0.827	3	0.259, 1.287	4,1	e		108/108	W,Y,H,L,F
270	G	-1.384	9	-1.681,-1.314	9,9	e	f	108/108	G
271	R	0.024	5	-0.260, 0.259	6,4	e		108/108	N,Q,R,S,E,K,H,T,A
272	W	1.981	1	0.980, 2.930	2,1	b		108/108	H,A,F,I,M,W,Y,L
273	Y	1.309	1	0.746, 1.749	3,1	b		108/108	W,Y,R,Q,T,H,F,I
274	E	-1.45	9	-1.681,-1.384	9,9	e	f	108/108	D,Q,E
275	I	-0.734	7	-1.007,-0.565	8,7	b		108/108	I,V,M,R,A,T
276	T	0.164	5	-0.172, 0.397	6,4	e		107/108	T,D,A,K,H,C,S,R,P,Q,V,N
277	P	-0.91	8	-1.249,-0.700	9,7	e	f	105/108	A,D,G,P
278	E	0.009	5	-0.343, 0.259	6,4	e		105/108	Q,N,G,E,T,D,K,H
279	K	-0.452	6	-0.700,-0.260	7,6	e		104/108	R,Q,N,D,K,E,I,S
280	N	-0.854	8	-1.126,-0.700	8,7	e	f	104/108	S,F,N,H,K,Y
281	P	0.679	3	0.135, 0.980	5,2	e		104/108	N,L,Q,R,G,P,S,E,M,K
282	Q	-1.205	9	-1.384,-1.126	9,8	e	f	104/108	Q,L,A,H
283	L	-0.939	8	-1.187,-0.763	8,7	b		106/108	A,Y,F,L,V
284	K	0.269	4	-0.078, 0.558	5,3	e		106/108	R,G,N,L,Q,K,H,E
285	D	-0.499	6	-0.763,-0.343	7,6	e		107/108	D,A,T,S,E,R,Y,N
286	L	-0.333	6	-0.633,-0.078	7,5	b		107/108	L,V,Q,W,F,S,I,M,T
287	D	-0.518	7	-0.826,-0.343	7,6	e		107/108	N,D,H,G
288	V	-0.154	5	-0.495, 0.024	6,5	b		107/108	M,V,I,L,A
289	F	0.878	2	0.397, 1.287	4,1	b		107/108	A,G,H,M,L,F,S
290	I	-0.426	6	-0.700,-0.260	7,6	b		106/108	A,V,L,I,F
291	S	0.249	4	-0.078, 0.558	5,3	b		106/108	G,L,N,K,T,A,D,F,S,I
292	S	2.565	1	1.287, 2.930	1,1	b		106/108	S,I,F,M,E,C,H,A,T,L,N,V,Y,W
293	V	0.645	3	0.135, 0.980	5,2	b		106/108	L,V,I,S,M,C,T,A
294	D	-0.121	5	-0.420, 0.135	6,5	e		106/108	D,K,R,E,Q,N
295	M	-0.571	7	-0.826,-0.420	7,6	b		106/108	I,L,V,M
296	K	0.131	5	-0.172, 0.397	6,4	e		105/108	S,N,E,M,K,R,T
297	E	-0.676	7	-0.947,-0.495	8,6	e		105/108	E,V,Q,N,G,R,K
298	G	-0.789	7	-1.126,-0.565	8,7	b		106/108	G,E,V,Q,N
299	G	1.058	2	0.558, 1.287	3,1	b		106/108	G,A,T,S,E
300	L	-0.539	7	-0.826,-0.343	7,6	b		106/108	L,I,M,V,P,H,T
301	L	1.302	1	0.746, 1.749	3,1	b		106/108	E,V,M,L,I,F,Y
302	L	-0.297	6	-0.633,-0.078	7,5	b		106/108	A,G,M,V,F,I,L
303	P	-1.271	9	-1.571,-1.126	9,8	b	s	106/108	P,L
304	H	-0.274	6	-0.633, 0.024	7,5	e		106/108	Q,F,L,N,Y,H
305	Y	-0.243	6	-0.565, 0.024	7,5	b		105/108	Y,F
306	N	-1.436	9	-1.681,-1.384	9,9	e	f	105/108	H,Y,N,S
307	S	-1.378	9	-1.571,-1.314	9,9	e	f	105/108	S,T
308	K	-0.786	7	-1.007,-0.633	8,7	e		105/108	E,T,K,R
309	A	-0.519	7	-0.826,-0.343	7,6	b		106/108	S,T,A
310	I	-0.383	6	-0.633,-0.172	7,6	b		106/108	I,S,V,M,R,T
311	V	-0.038	5	-0.343, 0.135	6,5	b		106/108	L,V,R,Y,W,F,I,S,M,H,K,T
312	I	-0.004	5	-0.343, 0.259	6,4	b		106/108	A,T,V,M,I,L
313	L	0.304	4	-0.078, 0.558	5,3	b		106/108	V,L,G,C,M,I,A,T
314	V	0.293	4	-0.078, 0.558	5,3	b		106/108	T,A,M,I,F,Y,Q,V,L
315	I	-0.951	8	-1.187,-0.826	8,7	b		106/108	A,I,M,V
316	N	-0.114	5	-0.420, 0.135	6,5	b		106/108	G,V,N,L,D,A,T,E,I
317	E	-0.11	5	-0.420, 0.135	6,5	e		106/108	S,E,K,D,N,Q,R,G
318	G	-1.38	9	-1.681,-1.249	9,9	e	f	106/108	G
319	E	1.021	2	0.558, 1.287	3,1	e		106/108	N,V,Q,R,Y,I,S,C,E,H,K,A,D,T
320	A	-0.682	7	-1.007,-0.495	8,6	e		106/108	V,G,A
321	K	1.113	2	0.558, 1.287	3,1	e		106/108	T,D,K,H,E,S,W,Y,R,Q,L,N
322	I	0.817	3	0.259, 1.287	4,1	b		106/108	V,L,W,Y,M,F,I,T,A
323	E	-1.536	9	-1.681,-1.571	9,9	e	f	106/108	E
324	L	-0.981	8	-1.249,-0.826	9,7	b		106/108	V,M,I,F,L
325	V	-1.071	8	-1.314,-0.947	9,8	b		106/108	L,I,V,G,T,A
326	G	-0.592	7	-0.887,-0.420	8,6	b		105/108	G,R,A,S,C
327	P	2.155	1	1.287, 2.930	1,1	e		105/108	H,F,I,E,P,L,V,Q
328	S	0.8	3	0.259, 0.980	4,2	e		104/108	K,H,T,S,E,R,Y,L,N,Q
329	D	0.549	3	0.135, 0.746	5,3	e		103/108	G,R,L,N,V,Q,K,D,I,S,M,E
330	Q	-0.194	6	-0.495, 0.024	6,5	e		103/108	N,Q,K,H,A,F,S,E
331	Q	0.038	5	-0.343, 0.259	6,4	e		103/108	Q,N,G,R,E,S,T,A,D,K,H
332	Q	0.52	3	0.024, 0.746	5,3	e		64/108	K,D,T,S,E,P,R,G,Y,Q
333	Q	0.018	5	-0.343, 0.259	6,4	e		66/108	P,G,R,V,Q,K,D,E
334	D	0.295	4	-0.078, 0.558	5,3	e		76/108	G,N,L,Q,K,H,T,D,S,E
335	E	1.796	1	0.980, 2.930	2,1	e		81/108	H,K,D,T,S,I,E,P,R,G,Q
336	S	2.448	1	1.287, 2.930	1,1	e		97/108	N,V,Q,P,G,R,I,S,E,M,D,A,T
337	L	2.83	1	1.749, 2.930	1,1	e		97/108	A,T,K,E,M,I,S,W,P,G,R,V,Q,N,L
338	E	0.754	3	0.259, 0.980	4,2	e		99/108	G,R,N,Q,K,H,S,E
339	V	-0.111	5	-0.495, 0.135	6,5	b		99/108	A,F,I,S,Y,L,Q,V
340	Q	0.568	3	0.135, 0.746	5,3	e		101/108	Q,V,L,N,R,E,M,I,T,D,K,H
341	R	0.208	4	-0.172, 0.397	6,4	e		101/108	R,K,T,S,N,L,Q
342	Y	-0.44	6	-0.763,-0.260	7,6	b		101/108	V,L,I,F,Y,A,G
343	R	1.19	2	0.558, 1.749	3,1	e		101/108	V,Q,N,R,E,S,D,A,T,K
344	A	-0.459	6	-0.763,-0.260	7,6	e		101/108	S,G,K,A,D,T
345	E	1.057	2	0.558, 1.287	3,1	e		101/108	P,R,N,Q,H,K,D,T,S,E
346	L	-0.876	8	-1.126,-0.700	8,7	b		101/108	L,V
347	S	-1.236	9	-1.463,-1.126	9,8	e	f	101/108	S,C,K,T,A
348	E	1.248	1	0.558, 1.749	3,1	e		101/108	E,S,I,T,D,A,K,Q,R,P
349	D	0.902	2	0.259, 1.287	4,1	e		101/108	E,D,H,K,Q,N,G,R
350	D	-1.002	8	-1.249,-0.887	9,8	e	f	101/108	G,T,D,V,E
351	V	-0.084	5	-0.420, 0.135	6,5	b		100/108	G,T,A,L,F,I,V
352	F	0.313	4	-0.078, 0.558	5,3	b		100/108	F,I,L,V,Y
353	V	-0.357	6	-0.633,-0.172	7,6	b		100/108	A,I,V
354	I	-1.028	8	-1.249,-0.887	9,8	b		100/108	T,I,V,M
355	P	-1.236	9	-1.571,-1.066	9,8	b	s	100/108	L,P
356	A	-0.975	8	-1.249,-0.826	9,7	b		100/108	S,L,A,T,P
357	A	0.165	5	-0.260, 0.558	6,3	e		100/108	T,A,D,G,S
358	Y	-0.229	6	-0.633, 0.024	7,5	b		101/108	F,Y,H
359	P	-1.233	9	-1.571,-1.066	9,8	b	s	101/108	P,V
360	V	0.195	4	-0.172, 0.397	6,4	b		101/108	T,A,V,L,N,I,F
361	A	-0.419	6	-0.700,-0.172	7,6	b		101/108	V,S,T,A
362	I	0.657	3	0.259, 0.980	4,2	b		101/108	M,V,L,S,F,I
363	N	0.201	4	-0.172, 0.397	6,4	e		101/108	K,T,S,I,M,E,R,N,L,V
364	A	-1.065	8	-1.314,-0.947	9,8	b		100/108	S,G,A,T
365	T	-1.018	8	-1.249,-0.887	9,8	e	f	99/108	L,N,I,S,V,T,A
366	S	-0.731	7	-0.947,-0.565	8,7	e		101/108	T,R,K,Q,E,L,S
367	N	-0.181	6	-0.495, 0.024	6,5	e		101/108	T,D,K,E,S,P,Q,N
368	L	-0.482	6	-0.826,-0.260	7,6	b		101/108	M,V,L,I,F
369	N	0.189	4	-0.172, 0.397	6,4	e		101/108	E,F,I,S,D,T,H,K,V,Q,N,L,Y,R
370	F	0.948	2	0.397, 1.287	4,1	b		101/108	A,T,M,I,S,F,G,V,L
371	F	2.081	1	1.287, 2.930	1,1	b		101/108	L,V,Y,S,I,F,A,T
372	A	0.424	4	-0.078, 0.746	5,3	b		101/108	A,W,G,V,E,S
373	F	-1.128	8	-1.384,-1.007	9,8	b		101/108	F,I,L
374	G	-0.849	7	-1.187,-0.633	8,7	b		101/108	V,S,A,G
375	I	-0.895	8	-1.126,-0.763	8,7	b		101/108	V,I,L
376	N	-1.462	9	-1.681,-1.384	9,9	e	f	100/108	K,N,F
377	A	-1.056	8	-1.314,-0.887	9,8	b		100/108	A,G
378	E	0.74	3	0.259, 0.980	4,2	e		100/108	E,S,D,K,H,Q,N,L,Y,R,G,P
379	N	-1.043	8	-1.249,-0.947	9,8	e	f	100/108	D,Y,N,E
380	N	-1.473	9	-1.681,-1.384	9,9	e	f	100/108	S,N
381	Q	0.145	5	-0.260, 0.397	6,4	e		100/108	N,L,Q,R,Y,F,I,M,E,H,K
382	R	-1.219	9	-1.463,-1.126	9,8	e	f	100/108	E,R,K
383	N	-0.902	8	-1.126,-0.763	8,7	b		100/108	H,Y,T,I,S,N
384	F	-1.362	9	-1.571,-1.249	9,9	b	s	100/108	F,L
385	L	-1.107	8	-1.314,-0.947	9,8	b		100/108	I,F,L,V
386	A	-0.835	7	-1.066,-0.700	8,7	e		101/108	T,A,V,S
387	G	-1.025	8	-1.314,-0.826	9,7	e	f	100/108	S,A,G
388	E	0.424	4	0.024, 0.746	5,3	e		99/108	Q,G,R,E,S,F,D,A,H,K
389	K	0.106	5	-0.260, 0.397	6,4	e		99/108	E,S,I,T,D,K,Q,N,R
390	D	-0.726	7	-1.007,-0.495	8,6	e		82/108	E,Q,H,R,D,A
391	N	-1.413	9	-1.571,-1.314	9,9	e	f	99/108	S,N
392	V	-0.69	7	-0.947,-0.495	8,6	b		84/108	P,I,V,M
393	M	-0.313	6	-0.633,-0.078	7,5	b		84/108	W,L,I,M,V
394	S	-0.227	6	-0.565, 0.024	7,5	e		83/108	N,L,Q,G,R,S,M,K,D
395	E	-0.666	7	-0.947,-0.495	8,6	e		83/108	N,Q,S,E,K,H,A,D
396	I	-0.648	7	-0.947,-0.495	8,6	b		83/108	L,I,M,V
397	P	0.885	2	0.397, 1.287	4,1	e		83/108	P,H,G,D,N,E,Q
398	T	0.731	3	0.259, 0.980	4,2	e		84/108	N,Q,P,R,I,S,E,K,T
399	E	-0.57	7	-0.887,-0.343	8,6	e		84/108	D,A,P,V,E,Q,L
400	V	-1.302	9	-1.571,-1.187	9,8	b	s	84/108	T,A,V
401	L	-0.338	6	-0.633,-0.172	7,6	e		84/108	R,Q,L,N,T,K,M,S,I,F
402	D	-0.261	6	-0.565,-0.078	7,5	e		84/108	G,R,D,N,Q,V,E
403	V	-0.119	5	-0.495, 0.135	6,5	b		84/108	A,M,V,I,L
404	S	0.312	4	-0.078, 0.558	5,3	b		84/108	S,I,M,G,A,T
405	F	-1.446	9	-1.681,-1.384	9,9	b	s	84/108	F
406	P	-0.286	6	-0.633,-0.078	7,5	e		80/108	A,D,K,E,S,G,P,Q,N
407	A	0.89	2	0.259, 1.287	4,1	e		80/108	G,L,V,A,I,S,M,E
408	S	-0.834	7	-1.066,-0.700	8,7	e		80/108	S,Q,P,K,G
409	G	0.929	2	0.397, 1.287	4,1	e		84/108	A,I,S,E,G,R,Q,V
410	N	0.703	3	0.259, 0.980	4,2	e		84/108	D,K,H,E,S,R,P,Q,N
411	K	-0.029	5	-0.420, 0.259	6,4	e		84/108	L,Q,R,M,E,K,A,D
412	V	-0.585	7	-0.887,-0.420	8,6	b		83/108	L,I,V,M,T,A
413	E	-0.343	6	-0.633,-0.172	7,6	e		83/108	D,K,Q,M,V,E,N
414	K	-0.088	5	-0.420, 0.135	6,5	e		82/108	K,R,T,N,S,Q,E
415	L	-0.739	7	-1.007,-0.565	8,7	b		82/108	M,V,L,I
416	I	-0.085	5	-0.495, 0.135	6,5	b		82/108	V,L,I,F
417	K	0.464	4	0.024, 0.746	5,3	e		82/108	T,K,E,S,R,G,Q,N
418	K	0.121	5	-0.260, 0.397	6,4	e		83/108	Q,E,N,S,Y,R,K
419	Q	-1.013	8	-1.249,-0.887	9,8	e	f	83/108	Q,P,H,K
420	S	1.648	1	0.980, 1.749	2,1	e		82/108	R,N,V,Q,K,D,T,S,E,M
421	E	0.274	4	-0.078, 0.558	5,3	e		82/108	Y,G,R,Q,L,N,D,T,K,E,M
422	S	-1.507	9	-1.681,-1.463	9,9	e	f	82/108	S,Y
423	H	1.171	2	0.558, 1.749	3,1	e		82/108	C,I,F,Y,H
424	F	-1.444	9	-1.681,-1.384	9,9	b	s	82/108	F
425	V	-0.313	6	-0.633,-0.078	7,5	b		82/108	F,L,M,V,A,T
426	D	0.092	5	-0.343, 0.397	6,4	e		82/108	D,A,T,P,K,S,N
427	A	0.508	4	0.024, 0.746	5,3	e		82/108	M,S,I,T,A,K,H,Q,R,G
428	Q	0.365	4	-0.078, 0.746	5,3	e		82/108	D,H,K,E,S,P,R,G,Q,N,L
429	P	0.777	3	0.259, 1.287	4,1	e		81/108	N,V,Q,P,R,G,S,E,H,K
430	E	0.557	3	0.135, 0.746	5,3	e		81/108	Q,L,G,R,E,S,D,H,K
431	Q	0.691	3	0.259, 0.980	4,2	e		81/108	G,R,P,Q,K,H,E,S
432	Q	-0.028	5*	-0.826, 0.558	7,3	e		7/108	E,Q
433	Q	1.11	2*	0.135, 1.749	5,1	e		8/108	G,Q,E
434	R	0.931	2	0.397, 1.287	4,1	e		74/108	E,I,S,K,H,Q,N,R,P
435	E	0.05	5	-0.343, 0.259	6,4	e		62/108	R,G,Q,K,H,D,F,S,E
436	E	0.982	2	0.397, 1.287	4,1	e		62/108	A,K,E,S,P,R,G,Q
437	G	2.877	1	1.749, 2.930	1,1	e		64/108	D,K,E,S,G,R,Q,N
438	H	2.165	1	1.287, 2.930	1,1	e		66/108	E,S,D,H,K,Q,N,P,R,G
439	K	0.744	3	0.259, 0.980	4,2	e		66/108	S,E,K,H,A,Q,G,R
440	G	1.116	2	0.397, 1.749	4,1	e		66/108	D,A,G,K,R,E,S
441	R	0.618	3	0.135, 0.980	5,2	e		66/108	K,T,S,I,R,G,N,Q
442	K	0.61	3	0.135, 0.980	5,2	e		64/108	E,F,S,D,H,K,N,G,R
443	G	2.843	1	1.749, 2.930	1,1	e		62/108	Q,V,G,P,E,I,S,D,A,K,H
444	S	2.491	1	1.287, 2.930	1,1	e		57/108	A,H,K,S,P,R,Q,L
445	L	-0.292	6	-0.700, 0.024	7,5	b		53/108	S,F,I,L,E
446	S	0.023	5	-0.343, 0.259	6,4	b		52/108	F,S,A,T,N,L,P,Y
447	S	-1.226	9	-1.463,-1.126	9,8	b	s	52/108	T,P,S,N
448	I	-1.151	8	-1.384,-1.007	9,8	b		49/108	I,L,V
449	L	-1.05	8	-1.384,-0.887	9,8	b		48/108	S,F,L
450	G	2.412	1	1.287, 2.930	1,1	e		38/108	G,R,A,D,S,N
451	S	1.726	1	0.746, 2.930	3,1	e		37/108	T,A,G,F,S
452	L	1.34	1	0.397, 1.749	4,1	e		25/108	L,F,M
453	Y	-0.018	5	-0.633, 0.397	7,4	e		23/108	Y,H
*Below the confidence cut-off - The calculations for this site were performed on less than 6 non-gaped homologue sequences,
or the confidence interval for the estimated score is equal to- or larger than- 4 color grades.

## Sheet: Supplementary Table 10
Docking Score
A Chain VacV (Red)
B Chain caspase3 (Green)
Receptor interface residue(s):	Ligand interface residue(s):	Receptor-ligand interface residue pair(s):
LEU 27A 4.232	LYS 57B 4.398	27A - 210B 4.232
HIS 71A 2.649	GLY 60B 2.823	71A - 250B 2.649
PRO 92A 4.726	MET 61B 4.231	71A - 252B 3.041
GLY 111A 2.897	THR 62B 3.185	92A - 252B 4.726
THR 112A 4.358	SER 63B 2.389	111A - 250B 3.624
THR 113A 2.026	ARG 64B 4.319	111A - 252B 2.897
ARG 139A 2.535	SER 65B 0.881	112A - 252B 4.358
GLN 141A 2.421	GLY 66B 4.836	113A - 252B 2.026
ASP 142A 4.371	GLU 123B 4.791	139A - 210B 4.132
PHE 143A 3.353	OCS 163B 2.923	139A - 211B 2.535
GLN 152A 0.881	GLY 165B 4.968	141A - 208B 3.475
TYR 154A 2.930	THR 166B 2.758	141A - 210B 2.421
GLN 156A 3.185	LEU 168B 4.708	141A - 211B 2.625
GLY 157A 1.877	TYR 204B 1.877	142A - 210B 4.371
PHE 158A 2.954	TRP 206B 2.954	143A - 208B 3.353
SER 159A 2.758	ARG 207B 4.149	152A - 63B 2.389
LYS 160A 4.311	ASN 208B 3.353	152A - 64B 4.319
ASN 161A 2.851	SER 209B 4.112	152A - 65B 0.881
ILE 162A 2.886	LYS 210B 2.421	152A - 66B 4.836
SER 166A 2.730	ASP 211B 2.535	152A - 209B 4.112
ILE 171A 2.823	PHE 250B 2.649	154A - 252B 2.930
LYS 172A 4.980	PHE 252B 2.026	156A - 62B 3.185
SER 175A 3.522	THR 255B 4.616	156A - 63B 3.582
PHE 179A 3.364	PHE 256B 2.730	157A - 204B 1.877
GLY 180A 4.398		157A - 207B 4.149
		158A - 62B 4.679
		158A - 168B 4.970
		158A - 204B 3.528
		158A - 206B 2.954
		158A - 256B 3.172
		159A - 163B 2.923
		159A - 165B 4.983
		159A - 166B 2.758
		159A - 204B 3.611
		160A - 61B 4.311
		161A - 123B 4.791
		161A - 165B 4.968
		161A - 166B 2.851
		162A - 166B 2.962
		162A - 168B 4.708
		162A - 256B 2.886
		166A - 255B 4.616
		166A - 256B 2.730
		171A - 60B 2.823
		171A - 61B 4.231
		171A - 62B 4.699
		172A - 60B 4.980
		175A - 60B 3.522
		175A - 62B 3.806
		179A - 62B 3.364
		180A - 57B 4.398

[truncated: 1 more sheets: Supplementary Table 11]
